# Supplementary material for: Overimitation in Dogs: Is there a Link to the Quality of the Relationship with the Caregiver?
Source: Preprints.org preprint supplement (doi:10.20944/preprints202112.0302.v1), 2021-12-20
Supplement: Supplementary file 1 [file supplementary]

## Sheet: Sheet1
Dog	sex	breed	age_months	level_irrelevant_action	level_relevant_action	gaze_owner	gaze_alternation	affiliative	greeting	synchronization
1	F	Hungarian Viszla	10.8932	2	3	64.4	7	1	10.6	224.48
2	F	Hungarian Viszla	2.76164	2	2	238.52	22	3	0	72
3	F	Australian Shepherd	6.86849	2	1	219.84	15	0	12.72	200.96
4	F	Border Collie Mix	7.46027	1	3	24.92	2	0	7.88	164.92
5	M	Husky Mix	1.47123	1	3	68.32	19	2	0	29.04
6	M	Mix Cocker-Lagotto	1.68493	1	2	73.16	7	0	9.4	50.12
7	M	Rottweiler	4.62192	1	2	42	6	0	12.12	24.12
8	F	American Staffordshire	4.5589	1	1	191.04	9	0	12.88	95.88
9	F	Golden retriever	3.11781	1	1	110.6	29	4	10.96	50.8
10	M	Mix	4.95616	1	1	50.96	8	1	1.2	30.12
11	F	Labrador retriever	1.81096	1	1	48.32	9	0	3.88	50.52
12	M	Australian Shepherd	8.82192	1	0	65.04	2	1	0	35.72
13	M	Bearded Collie	8.36438	1	0	90.08	11	0	2.68	139.16
14	M	Australian Shepherd	12.211	1	0	89	9	2	15.64	214.8
15	M	Bearded Collie	4.67397	1	0	114.36	21	0	0	8.76
16	M	Belgian Shepherd	6.83836	0	3	91.92	44	0	60.64	37.36
17	F	Mix	9.11233	0	3	47.16	2	0	11.6	43.72
18	F	Labrador retriever	3.55616	0	3	58.16	8	0	0	89.68
19	F	White Swiss Shepherd	3.13699	0	3	69.52	12	0	3.68	76.16
20	M	Giant Schnauzer	7.80822	0	3	55	8	1	2.8	0
21	F	Airedale Terrier	1.1726	0	3	125.68	14	1	18.36	23.04
22	F	Mix	4.36164	0	2	103.2	8	0	0	49.68
23	M	Border Collie	6.87671	0	2	384.2	8	0	3.36	81
24	M	Flat Coated retriever	0.410959	0	2	129.96	6	3	6.2	314.48
25	F	German Shepherd	6.47671	0	2	115.52	7	0	0	94.72
26	M	Border Collie	5.54247	0	2	101.32	6	0	3.8	117.36
27	M	Mix	5.83014	0	2	65.52	7	0	1.52	9.48
28	M	English Springer Spaniel	8.29315	0	2	55.08	11	0	11.56	26.6
29	M	Beagle	5.44384	0	2	20.12	6	0	0	0
30	M	Shetland Sheepdog	3.09041	0	2	110.84	24	0	6.88	254.12
31	F	Mix	7	0	1	207.76	15	0	16.68	170.48
32	F	Shepherd Mix	6.83014	0	1	97.2	5	1	12.48	177.24
33	F	Hungarian Viszla	4.25479	0	1	144.76	18	2	15.6	123.8
34	M	Continental Bulldog	6.35616	0	1	78.64	11	0	5.24	109.6
35	M	Rhodesian Ridgeback	11.2411	0	1	185.52	5	2	10.76	355.12
36	M	Labrador retriever	6.91233	0	1	45.88	4	1	0	15.76
37	F	Border Collie	0.99726	0	1	120.24	25	0	13.36	82.6
38	F	Old German Shepherd	7.12603	0	1	57.16	7	0	4.12	92.12
39	M	Belgian Shepherd	5.64384	0	1	101.84	15	1	4.52	156.2
40	F	Mix	5.67123	0	1	52.2	5	1	3.68	62.96
41	M	Australian Shepherd	1.20822	0	1	95.52	56	0	20.28	44.36
42	F	Border Collie	1.79726	0	1	101.76	13	0	3.56	32.36
43	M	Spanish Water Dog	3.93151	0	1	127.6	7	0	13.68	320.16
44	M	Siberian Husky	5.04658	0	1	57.12	5	0	0	9.76
45	F	Mix	11.5205	0	1	42.84	1	0	2.24	23.88
46	M	Australian Shepherd	3.09315	0	0	48.2	2	0	4.52	66.36
47	M	Mix	10.1068	0	0	156.68	4	5	0	97.64
48	F	Shetland Sheepdog	4.58356	0	0	123	30	0	6.6	287.48
49	F	Mix	1.45753	0	0	44	8	0	2.96	23.48
50	M	Golden retriever	4.88767	0	0	84.4	11	1	2.4	54.92
51	F	Golden retriever	14.2301	0	0	55.08	10	1	4.8	151.32
52	M	Australian Shepherd	10.4384	0	0	36.48	3	1	3.6	11.96
53	F	Pyrenees Mountain Dog	4.43014	0	0	44.04	3	0	0	4.96
54	M	Akita	4.33699	0	0	31.28	5	0	0	4.48
55	F	Mix	8.63562	0	0	48.4	11	1	13.48	37.44
56	M	Mix	8.66575	0	0	73.84	15	8	23.44	83.08
57	M	Labrador retriever	8.99452	0	0	40.88	11	0	2.24	116.12
58	M	Mix	5.9589	0	0	69.56	9	0	8.32	40
